# Supplementary material for: Induction of transferrin aggregation by indazolium [tetrachlorobis(1H-indazole)ruthenate(iii)] (KP1019) and its biological function
Source: Royal Society of Chemistry journal article supplement (doi:10.1039/c9nj01342c), 2019-01-01
Supplement: c9nj01342c1.pdf [file c9nj01342c1.pdf]

Supplementary Information

## Induction of transferrin aggregation by indazolium [tetrachlorobis(1H-indazole)<sub>2</sub>ruthenate(III)] (KP1019) and its biological implication

Klaudyna Śpiewak,<sup>\*a</sup> Sylwia Świątek,<sup>b</sup> Barbara Jachimska,<sup>\*b</sup> Małorzata Brindell,<sup>\*a</sup>

<sup>a</sup>Department of Inorganic Chemistry, Faculty of Chemistry, Jagiellonian University, Gronostajowa 2, 30-387 Krakow, Poland

<sup>b</sup>Jerzy Haber Institute of Catalysis and Surface Chemistry, Polish Academy of Sciences, Niezapominajek 8, 30-239 Krakow, Poland

\*Corresponding authors, e-mail: [klaudyna.spiewak@gmail.com](mailto:klaudyna.spiewak@gmail.com), [ncjachim@cyf-kr.edu.pl](mailto:ncjachim@cyf-kr.edu.pl), [brindell@chemia.uj.edu.pl](mailto:brindell@chemia.uj.edu.pl)

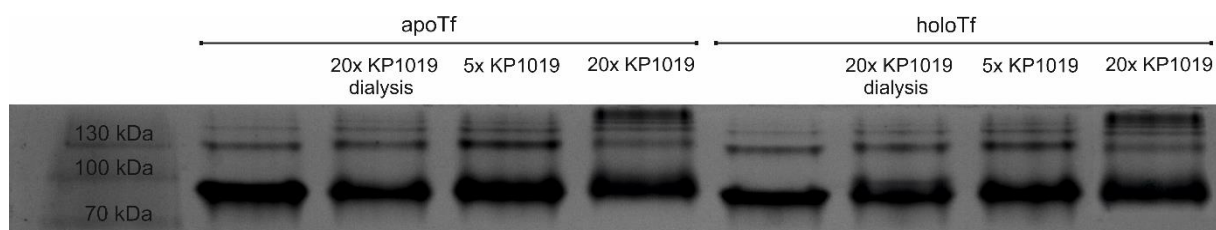

**Fig. S1.** Native electrophoresis PAGE gel analysis of homogeneity of the reaction mixtures obtained upon incubation of apoTf or holoTf with KP1019 in the following way: dialysis of Tfs in the presence of 20-fold excess of KP1019 (*20×KP1019 dialysis*) or direct reaction between reagents with 5- or 20-fold excess of KP1019 kept over Tf (*5×KP1019* and *20×KP1019 dialysis*, respectively). Incubation conditions: 50 mM HEPES pH 7.4, 100 mM NaCl, 25 mM NaHCO<sub>3</sub>; 37°C; 24 h. [apoTf] = [holoTf] = 1 mg/ml

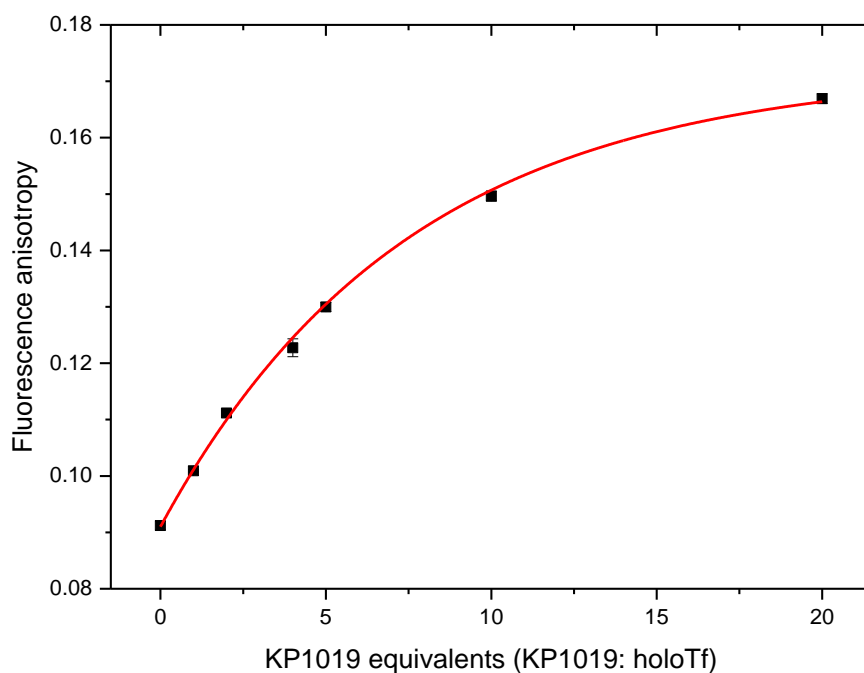

**Fig. S2.** Fluorescence anisotropy of the holoTf-AlexaFluor488 in the presence of increasing concentration of KP1019. HoloTf was incubated for 1 h at 37 °C with KP1019 before measurements. Experimental conditions: [holo-Tf] = 12.6  $\mu$ M. [KP1019] = 0-252  $\mu$ M; HEPES pH 7.4; [NaCl] = 0.1 M; [NaHCO<sub>3</sub>] = 25 mM; T = 25 °C (during the anisotropy measurement).

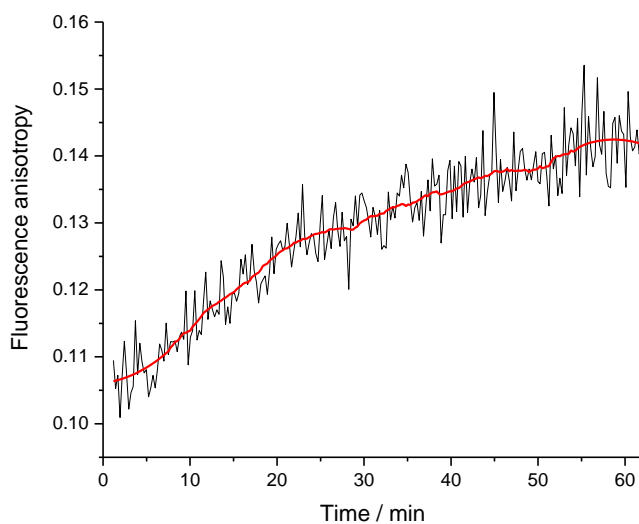

**Fig S3.** Kinetics of the reaction between holoTf-AlexaFluor488 and 20-fold excess of KP1019 followed by fluorescence anisotropy measurements. Experimental conditions: pH 7.4 (50 mM HEPES, 100 mM NaCl, 25 mM NaHCO<sub>3</sub>), 37°C. [Tf] = 12.6  $\mu$ M.

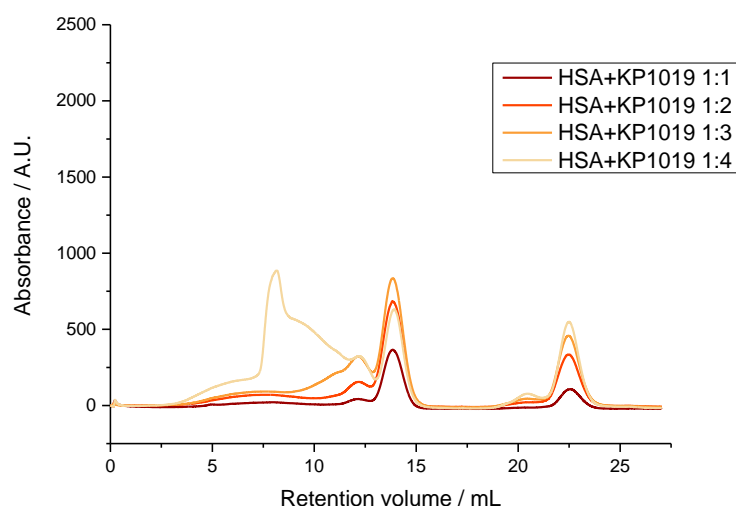

**Fig. S4** Chromatograms presenting Size Exclusion Chromatography separation of a reaction mixture resulting from the incubation of HSA with the increasing concentration of KP1019 during 24 h in buffer at pH 7.4 (50 mM HEPES, 100 mM NaCl, 25 mM NaHCO<sub>3</sub>) at 37°C. [HSA] = 10 mg/ml.

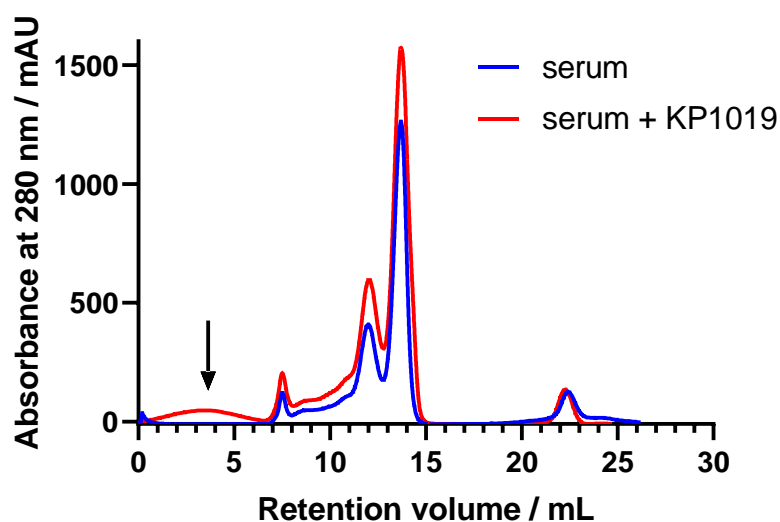

**Fig. S5** Chromatograms presenting Size Exclusion Chromatography separation of a reaction mixture resulting from the incubation of control human serum with the KP1019 during 24 h in buffer at pH 7.4 (50 mM HEPES, 100 mM NaCl, 25 mM NaHCO<sub>3</sub>) at 37°C. Ru concentration equivalent to the Ru concentration after venous application of KP1019 complex (20 mg/L of blood, taken from clinical studies: F. Lentz; Drescher, A.; Lindauer, A.; Henke, M.; Hilger, R. A.; Hartinger, C. G.; Scheulen, M. E.; Dittrich, C.; Keppler, B. K.; Jaehde, U. *Anticancer Drugs*. 2009, 97.)

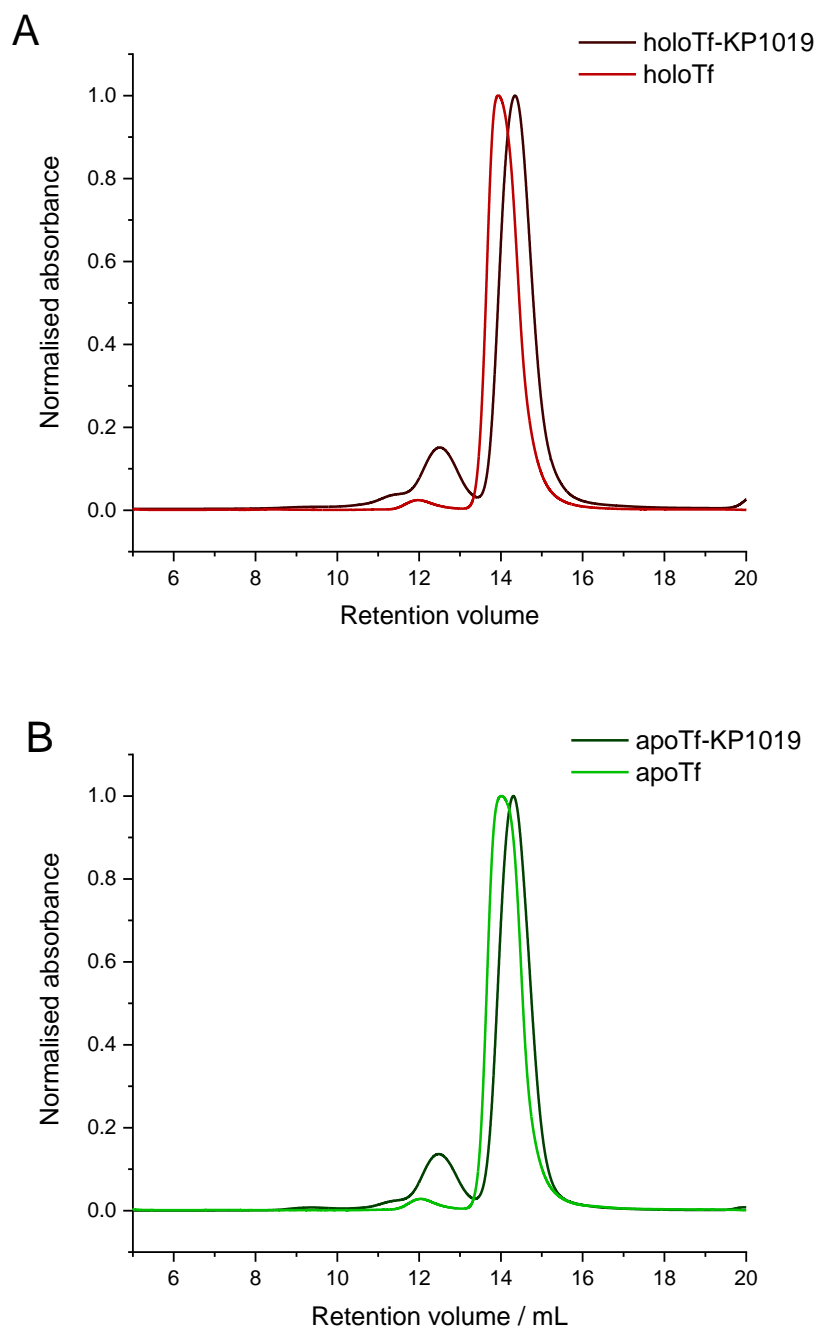

**Fig. S6.** Chromatograms presenting Size Exclusion Chromatography separation of adducts obtained by dialysis of apoTf A).and holoTf B) in the presence of 20-fold excess of KP1019 dissolved in buffer (PBS, pH 7.4) followed by dialysis to PBS. For adduct formation  $[\text{apoTf}] = [\text{holoTf}] = 10 \text{ mg/ml}$ .

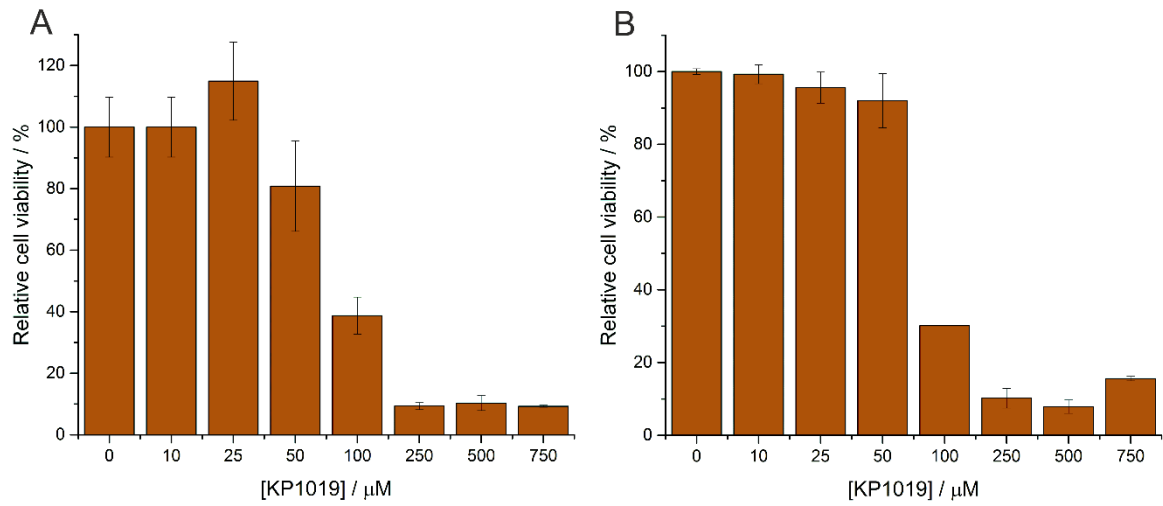

**Fig. S7.** The cytotoxic effect of KP1019 on human keratinocyte cells after 48 h incubation evaluated by A) MTT and B) Alamar Blue test.
